# Supplementary material
Source: publisher site journal article supplement (https://static.cambridge.org/content/id/urn:cambridge.org:id:article:S0007114520000264/resource/name/S0007114520000264supp001.docx)
Supplement: Supplementary file 1 [file S0007114520000264supp001.docx]

**Suppl. Fig.1: Body mass index (kg/m2) of infants exposed to GDM versus not exposed**

**
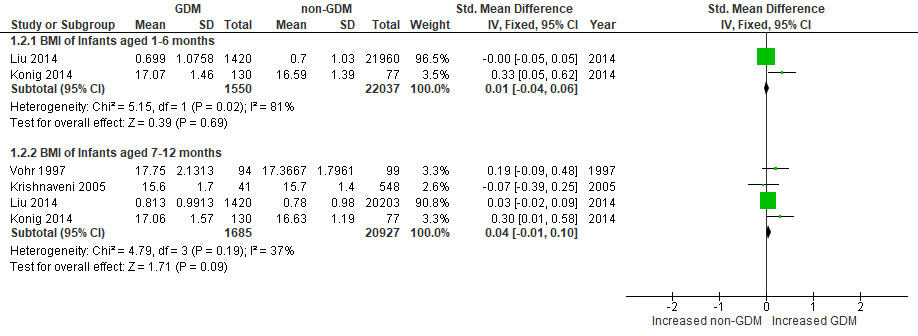
**

**Suppl. Fig.2: Exclusive/predominant breastfeeding** ≥ **5 months for infants exposed to GDM versus not exposed**


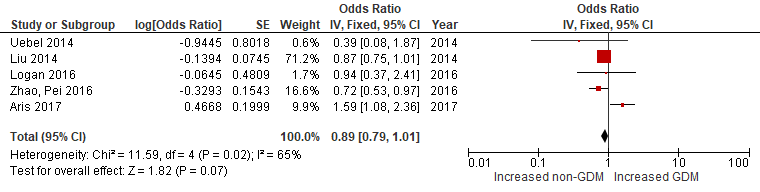


**Suppl. Fig.3: No breastmilk feeding under 5 months for infants exposed to GDM versus not exposed**

**
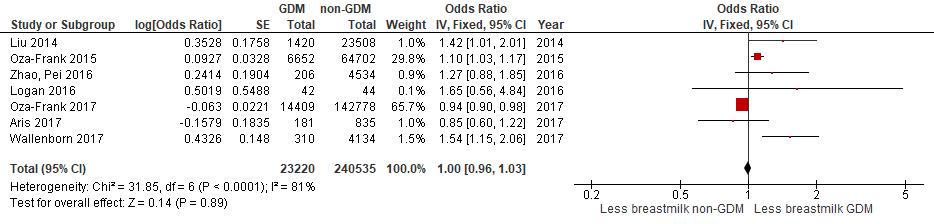
**

**Suppl. Fig.4: Introduction of formula milk/breastmilk substitute before hospital discharge for infants exposed to GDM versus not exposed**


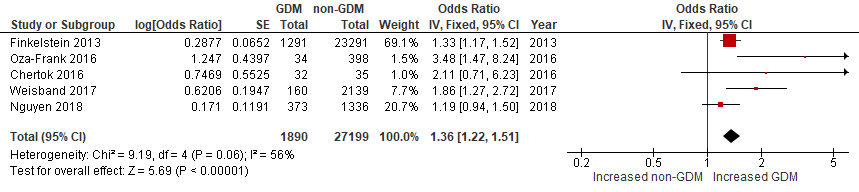


**Suppl. Fig.5: Continued breastfeeding at 12 months for infants exposed to GDM versus not exposed**


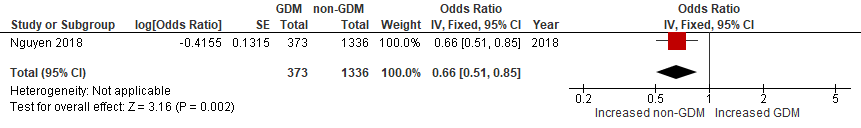


**Suppl. Fig.6: Duration of breastfeeding among infants exposed to GDM versus not exposed**

**
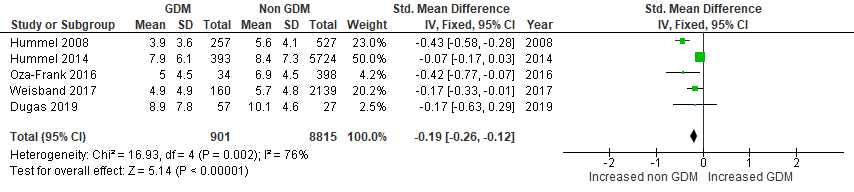
**

**Suppl. Fig.7: Breastmilk (mature milk) composition of GDM and non-GDM mothers**


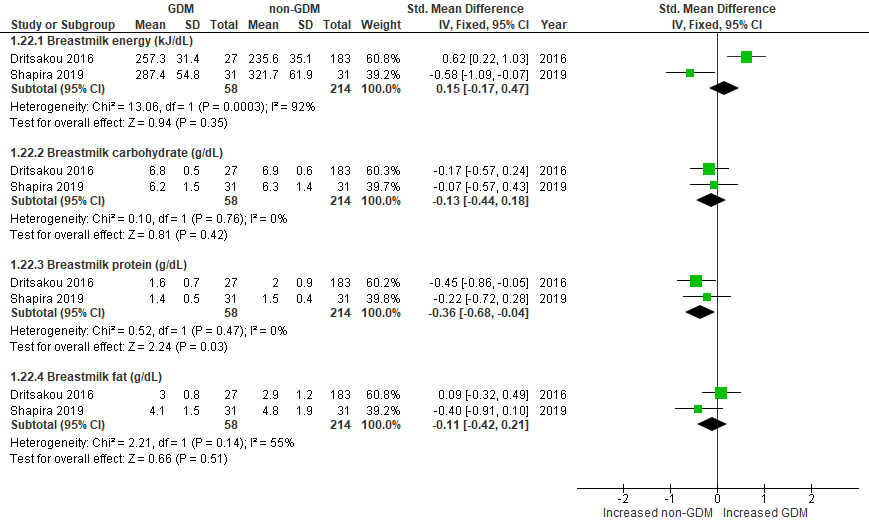


**Suppl. Fig.8: Weight (kg) or weight for age z-scores of infants exposed to GDM versus not exposed**

**
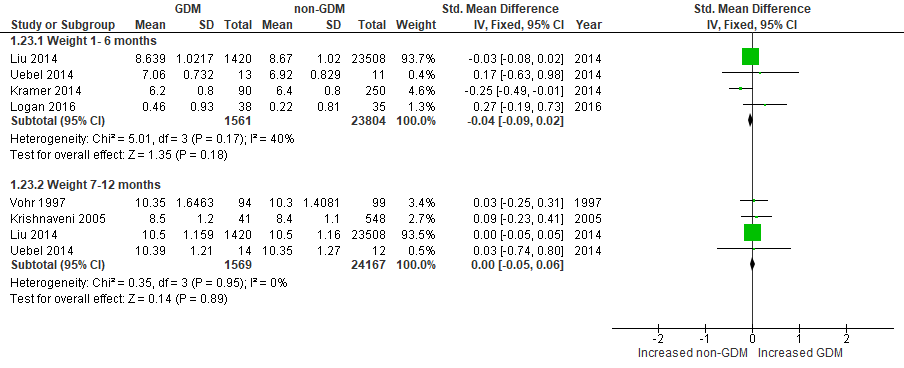
**

**Suppl. Fig.9: Length (cm) or length for age z-scores of infants exposed to GDM versus not exposed**


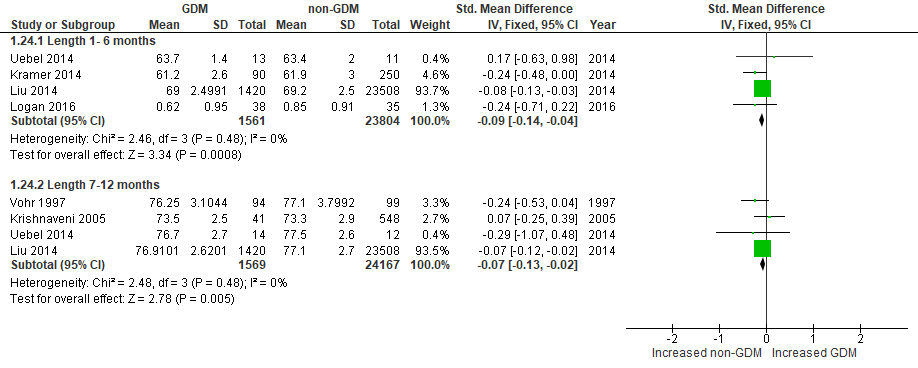


**Suppl. Fig.10: Head circumference (cm) of infants exposed to GDM versus not exposed**

**
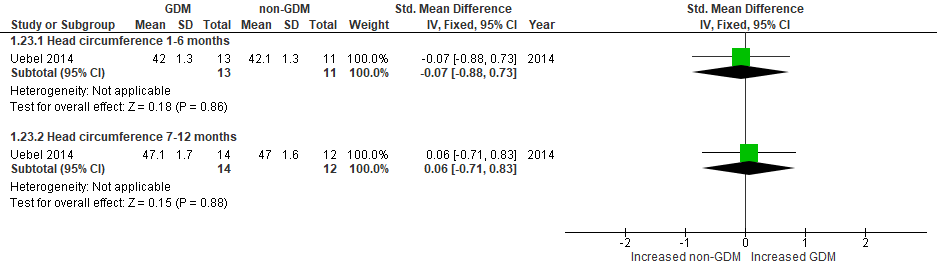
**

**Suppl. Fig.11: Abdominal circumference (cm) of infants exposed to GDM versus not exposed**


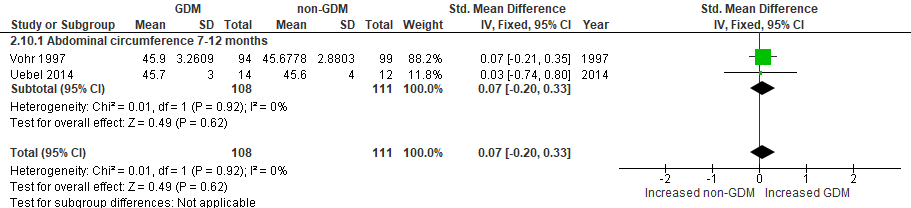


**Suppl. Fig.12: Fat mass (g) of infants exposed to GDM versus not exposed**


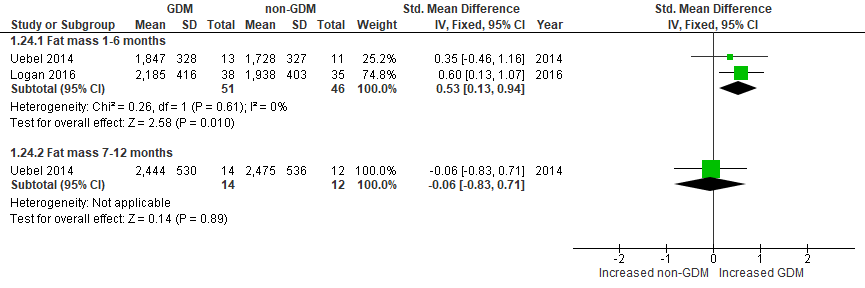


**Suppl. Fig.13: Skinfold thickness (mm) of infants exposed to GDM versus not exposed**

**
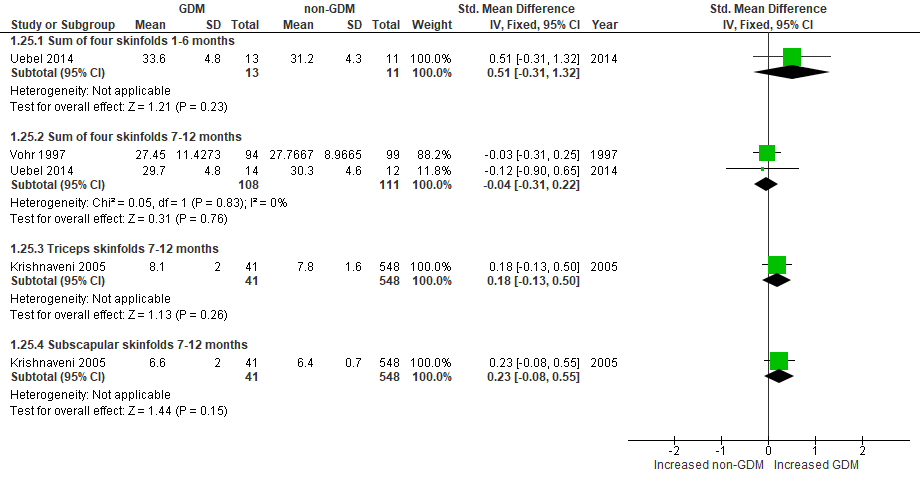
**
